# Supplementary material
Source: MDPI journal article supplement (https://www.mdpi.com/2073-4395/9/5/219)
Supplement: s1 [file s1]

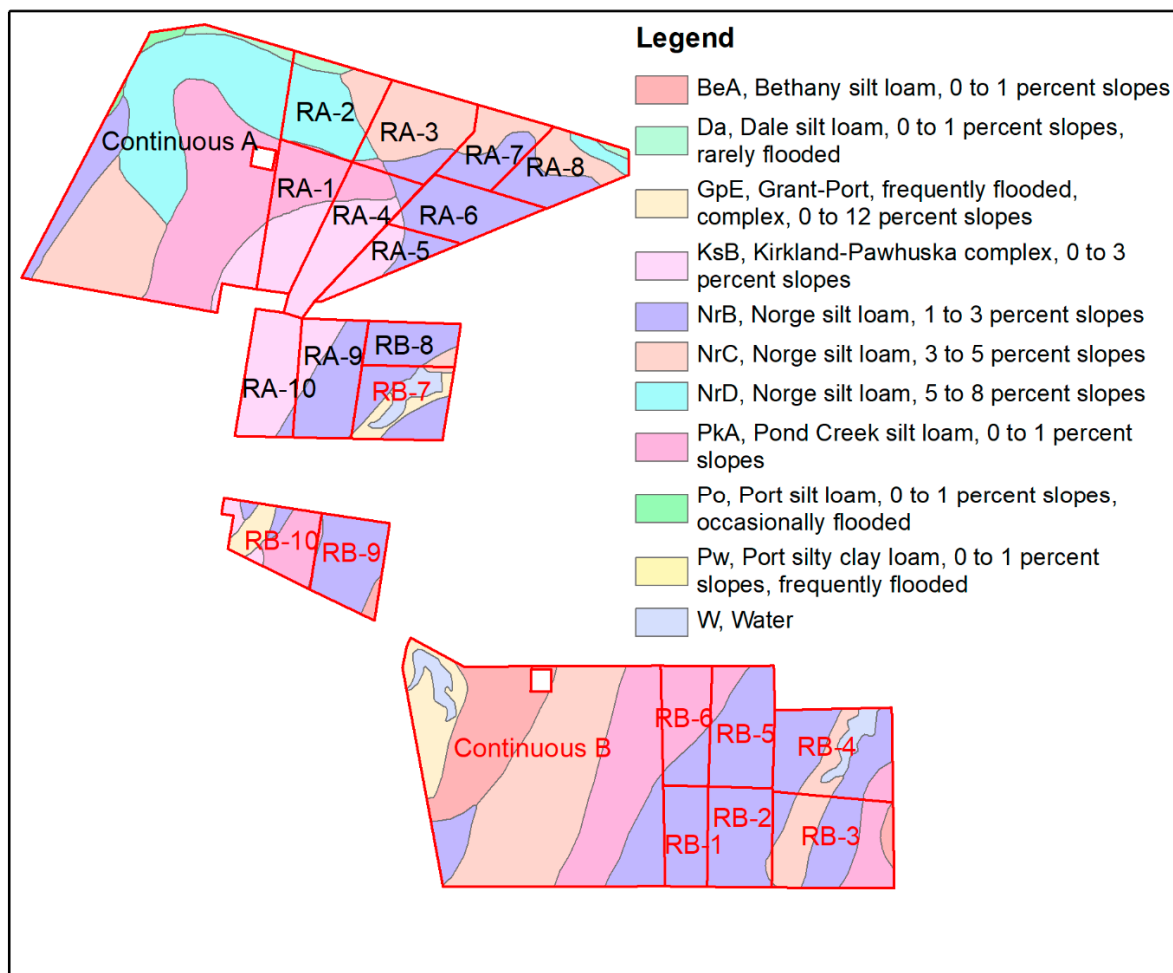

**FigureS1.** Soil types in the study area.

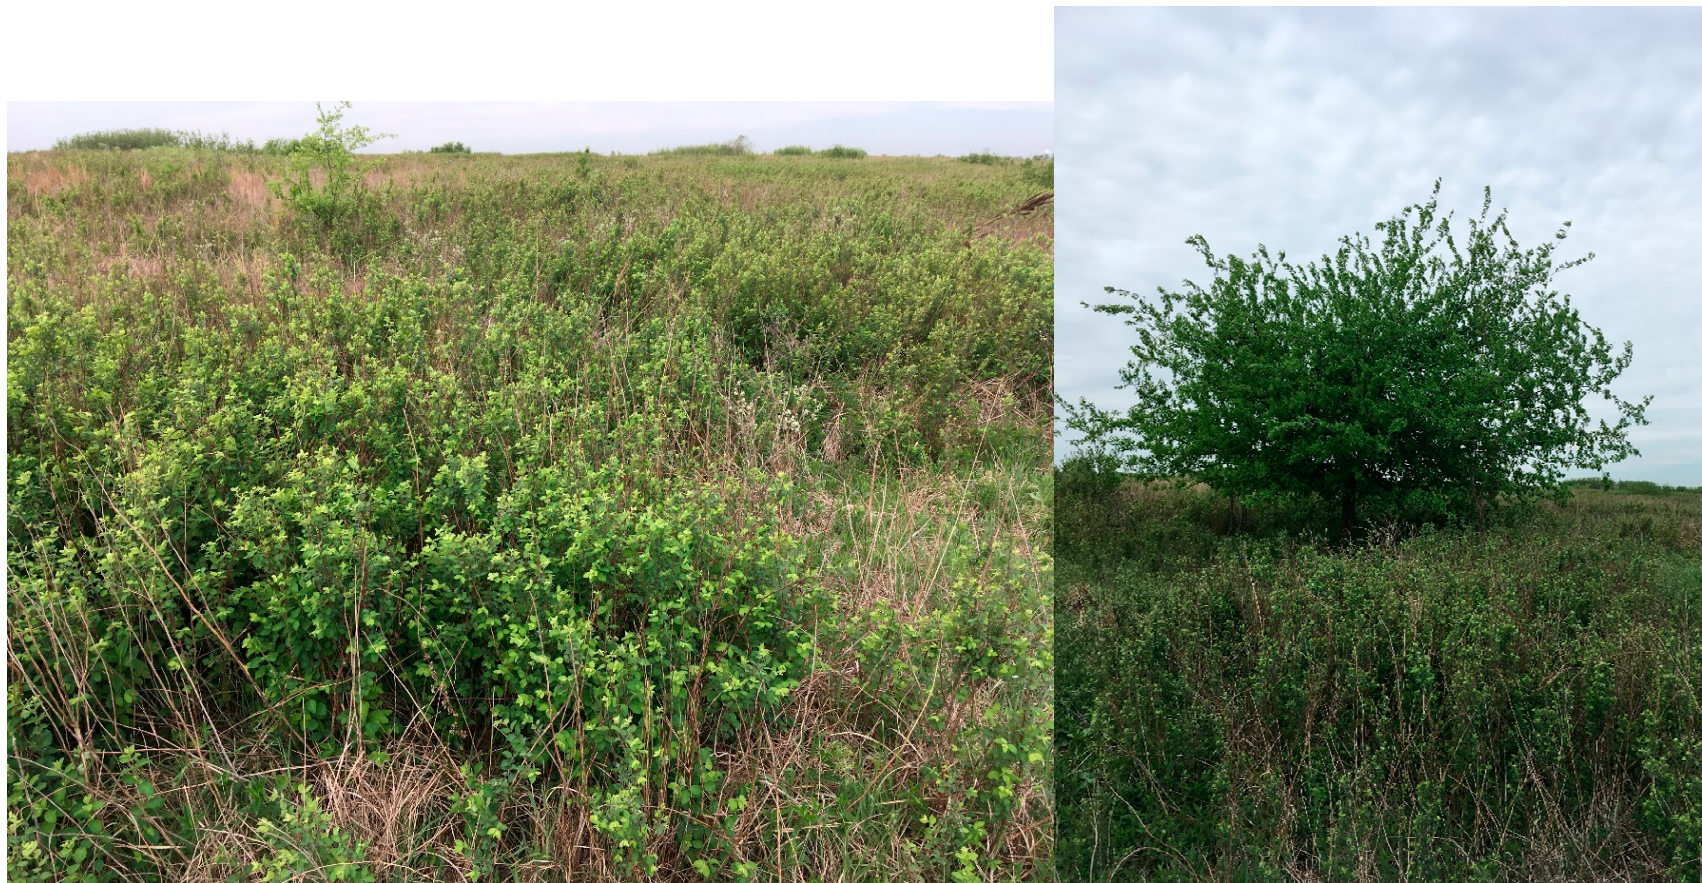

**Figure S2.** Shrubs and trees in the continuous grazing plot rep a.
